1 **Coding Complete Genome Sequences of Twenty-three SARS-CoV-2 Strains Isolated in the Philippines**

2  
3 John Mark Velasco,<sup>a,c</sup># Piyawan Chinnawirotpisan,<sup>a</sup> Khajohn Joonlasak,<sup>a</sup> Wudtichai Manasatienkij,<sup>a</sup> Angkana Huang,<sup>a</sup> Ma.  
4 Theresa Valderama,<sup>a</sup> Paula Corazon Diones,<sup>a</sup> Susie Leonardia,<sup>a</sup> Ma. Leonor Timbol,<sup>a</sup> Fatima Claire Navarro,<sup>b</sup> Vicente Villa  
5 II,<sup>b</sup> Henry Tabinas Jr.,<sup>b</sup> Domingo Chua Jr.,<sup>b</sup> Stefan Fernandez,<sup>a</sup> Anthony Jones,<sup>a</sup> Chonticha Klungthong,<sup>a</sup>

6  
7 <sup>a</sup> Department of Virology, U.S. Army Medical Directorate – Armed Forces Research Institute of Medical  
8 Sciences, Bangkok, Thailand

9 <sup>b</sup> V Luna Medical Center, Armed Forces of the Philippines Health Service Command, Quezon City, Philippines

10 <sup>c</sup> University of the Philippines Manila, Ermita, Manila, Philippines

11  
12 Running Head: Twenty-three SARS-CoV-2 from the Philippines

13  
14 #Address correspondence to John Mark S. Velasco, [VelascoJM@afirms.org](mailto:VelascoJM@afirms.org); [JSVelasco@up.edu.ph](mailto:JSVelasco@up.edu.ph)

## Coding Complete Genome Sequences of Twenty-three SARS-CoV-2 Strains Isolated in the Philippines

### Abstract

Here, we report the coding complete genome sequences of 23 severe acute respiratory syndrome coronavirus 2(SARS-CoV-2) strains from the Philippines. Sequences were obtained from nasopharyngeal and oropharyngeal swabs from COVID-19 positive patients. Mutation analysis showed the presence of the D614G mutation in the spike protein in 22 of 23 genomes.

Severe acute respiratory syndrome coronavirus 2 (SARS-CoV-2) belonging to the family *Coronaviridae* and genus *Betacoronavirus* is the causative agent of COVID-19(1). In the Philippines, the first confirmed SARS-CoV-2 case was reported on 30 January 2020(2) and as of 31 Aug 2020, more than 200,000 cases had been reported(3). Here, we announce the coding complete genome sequences of 23 SARS-CoV-2 strains collected from 3 April-18 July 2020 from COVID-19 RT-PCR positive Filipino patients(4). Viral RNA was extracted from nasopharyngeal/oropharyngeal swabs using QIAamp viral RNA Mini kit (Qiagen) and used as template for amplicon sequencing using ARTIC SARS-CoV-2 V3 primers(4). DNA libraries were constructed and multiplexed using Illumina DNA prep, and then pooled before sequencing. Sequencing was performed on MiSeq using the MiSeq reagent kit V 2(Illumina). Reference mapping was performed by BWA-MEM aligner using Wuhan-Hu-1 genome sequence(GenBank Accession number NC\_045512.2) as the reference sequence(5). Primer regions trimming and call variants ( $Q \geq 25$ ) were performed using iVar v.1.2.2(6) and samtools (7), respectively. Consensus sequences were generated by iVar v.1.2.2(6) ( $Q \geq 25$  and depth of coverage  $\geq 10$ ). Gaps, deletion, and ambiguous bases were identified and confirmed by genome-guided assembly with the reference sequence(NC\_045512.2) using Trinity v2.8.5(8) and Sanger sequencing. Lineage and clade were determined using Pangolin v.2.0.4(9), GISAID clade nomenclature(10), and phylogenetic analysis(11, 12, 13). We used MEGA 7.0(14) to examine nucleotide and amino acid substitutions. All tools were run with default parameters. Raw reads yielded a total of 8.4 gigabases (94% of the clusters with Phred quality score ( $Q \geq 30$ )). The length of reads obtained were 35-251 nucleotides and the range of number of reads obtained per library was 0.87 – 1.48 million reads. Consensus sequences lengths were similar to the Wuhan-Hu-1 strain(NC\_045512.2) with mean coverage ranging from 2,361X to 7,177X.

Table 1 shows strain details and mutations. 20/23 genomes collected between 25 June-18 July 2020 were classified under

50 clade GR/lineage B.1.1, a major lineage frequently found in Europe and exported to the rest of the world(9, 10). Two  
51 genomes(2/23) from 6 and 7 July 2020 were classified under clade GR/lineage B.1.1.28, found in Brazil(89%),  
52 UK(8%), and China(2%) ([https://cov-lineages.org/lineages/lineage\\_B.1.2.html](https://cov-lineages.org/lineages/lineage_B.1.2.html)). A single genome (1/23) was classified  
53 under clade O/lineage B.6, a global lineage mostly found in Singapore and India (<https://cov-lineages.org>). Four amino  
54 acid substitutions (ORF1b-P314L,S-D614G,N-R203K,and N-G204R), unique to clade GR (both lineages B.1.1 and  
55 B.1.1.28), were seen in all our sequences in this clade. Two sequences of lineage B.1.1 had a 21-nucleotide deletion in  
56 the N gene region. Five substitutions (ORF1a-R226K,ORF1a-E1126K,ORF1a-L3930F,S-V1176F,and ORF7b-V21I)  
57 were observed uniquely in 2 sequences of lineage B.1.1.28.

58 None of the Philippine SARS-CoV-2 sequences in GISAID (accessed 22 August 2020) with collection date before 25  
59 June 2020(15, 16) contained the D614G mutation. From the same set of data, lineage B.1.1 containing D614G was found  
60 in a sample collected on 25 June 2020. This observation coincides with our findings that the D614G mutation was  
61 observed from samples collected in June 2020(16). Our findings show the presence of lineages B.6, B.1.1 and B1.1.28,  
62 with the latter being first reported in the Philippines in this study.

63 The D614G mutation is currently the most prevalent variant worldwide and is associated with higher viral RNA  
64 levels and titers of pseudo viruses(17). In this study, all patients had no history of travel outside the country and  
65 acquired the disease in the National Capital Region, Region 3 and 4A(Table 1), providing evidence of local  
66 transmission. Multiple lineages and strains could have been introduced by travelers and Filipino repatriates(18).  
67 The D614G mutation is replacing and rapidly surpassing in prevalence the original strain circulating prior to June  
68 2020 and may partially explain the rapid rise of cases in the Philippines.

69 **Data availability.** The SARS-CoV-2 genomes from the Philippines were deposited in the GenBank database (accession  
70 nos. [MT919768-90](https://www.ncbi.nlm.nih.gov/nuclseq/MT919768-90)). The raw reads have been deposited in the NCBI Sequence Read Archive (SRA accession nos.  
71 [SRS7273360-82](https://www.ncbi.nlm.nih.gov/sra/SRS7273360-82)). The Bio Project accession no. is [PRJNA659293](https://www.ncbi.nlm.nih.gov/bioproject/PRJNA659293). The Bio Sample accession nos. are [SAMN15903138-](https://www.ncbi.nlm.nih.gov/biosample/SAMN15903138-60)  
72 [60](https://www.ncbi.nlm.nih.gov/biosample/60).

### 73 **Acknowledgments**

74 The authors acknowledge the support of the Department of Research and Training, Department of Pathology and  
75 Laboratories and Hospital Infection Control Committee of the V. Luna Medical Center (Quezon City, Philippines) for  
76 support with specimen collection. Informed consent for was obtained from the patients for SARS-CoV-2 testing. Sample

77 collection was considered as a public health effort and did not require an Institutional Review Board approved human use  
78 protocol. This study was funded by the Armed Forces Health Surveillance Branch (AFHSB) and its Global Emerging  
79 Infections Surveillance (GEIS) Section, USA under grant number P0128\_20\_AF\_13 for FY 2020. Material has been  
80 reviewed by the Walter Reed Army Institute of Research. There is no objection to its presentation and/or publication. The  
81 opinions or assertions contained herein are the private views of the author, and are not to be construed as official, or as  
82 reflecting true views of the Department of the Army or the Department of Defense. The investigators have adhered to the  
83 policies for protection of human subjects as prescribed in AR 70–25.

#### 84 **Competing interests**

85 None declared.

#### 86 **References**

- 87 1. Zhu N, Zhang D, Wang W, Li X, Yang B, Song J, Zhao X, Huang B, Shi W, Lu R, Niu P, Zhan F, Ma X, Wang  
88 D, Xu W, Wu G, Gao GF, Tan W, China Novel Coronavirus I, Research T. 2020. A Novel Coronavirus from  
89 Patients with Pneumonia in China, 2019. *N Engl J Med* 382:727-733.
- 90 2. Edrada EM, Lopez EB, Villarama JB, Salva Villarama EP, Dagoc BF, Smith C, Sayo AR, Verona JA, Trifalgar-  
91 Arches J, Lazaro J, Balinas EGM, Telan EFO, Roy L, Galon M, Florida CHN, Ukawa T, Villanueva AMG, Saito  
92 N, Nepomuceno JR, Ariyoshi K, Carlos C, Nicolasora AD, Solante RM. 2020. Correction to: First COVID-19  
93 infections in the Philippines: a case report. *Trop Med Health* 48:30.
- 94 3. WHO. 2020. Coronavirus disease 2019 (COVID-19) situation reports: World Health Organization;. <https://www.who.int/emergencies/diseases/novel-coronavirus-2019/situation-reports>. Accessed 8 Aug 2020.
- 95 4. al. DPRDe. 2020. COVID-19 ARTIC v3 Illumina library construction and sequencing protocol V.4, *on*  
96 Wellcome Sanger Institute. [https://www.protocols.io/view/covid-19-artic-v3-illumina-library-construction-an-](https://www.protocols.io/view/covid-19-artic-v3-illumina-library-construction-an-bgxjxkn)  
97 [bgxjxkn](https://www.protocols.io/view/covid-19-artic-v3-illumina-library-construction-an-bgxjxkn). Accessed 25 August 2020.
- 98 5. Li H. and Durbin R. 2009. Fast and accurate short read alignment with Burrows-Wheeler Transform.  
99 *Bioinformatics* 25:1754-60. <https://doi.org/10.1093/bioinformatics/btp324>.
- 100 6. Grubaugh ND, Gangavarapu K, Quick J, Matteson NL, De Jesus JG, Main BJ, Tan AL, Paul LM, Brackney DE,  
101 Grewal S, Gurfield N. 2019. An amplicon-based sequencing framework for accurately measuring intrahost virus  
102 diversity using PrimalSeq and iVar. *Genome biology* 20(1): 1-19.  
103 <https://genomebiology.biomedcentral.com/articles/10.1186/s13059-018-1618-7>.
- 104 7. Li H, Handsaker B, Wysoker A, Fennell T, Ruan J, Homer N, Marth G, Abecasis G, Durbin R. 2009. The  
105 sequence alignment/map format and SAMtools. *Bioinformatics* 25(16): 2078-2079.  
106 <https://doi.org/10.1093/bioinformatics/btp352>.
- 107 8. Grabherr MG, Haas BJ, Yassour M, Levin JZ, Thompson DA, Amit I, Adiconis X, Fan L, Raychowdhury R,  
108 Zeng Q, Chen Z. 2011. Trinity: reconstructing a full-length transcriptome without a genome from RNA-Seq data.  
109 *Nature biotechnology* 29(7): 644-652. <https://www.nature.com/articles/nbt.1883>.
- 110 9. Rambaut A, Holmes EC, O'Toole Á, Hill V, McCrone JT, Ruis C, Plessis L, Pybus OG. 2020. A dynamic  
111 nomenclature proposal for SARS-CoV-2 lineages to assist genomic epidemiology. *Nature Microbiology* (online  
112 ahead of print). <https://doi.org/10.1101/2020.04.17.046086>.
- 113 10. Alm E, Broberg EK, Connor T, Hodcroft EB, Komissarov AB, Maurer-Stoh S, Melidou A, Neher RA, Toole AO,  
114 Pereyaslov D. 2020. Geographical and temporal distribution of SARS-CoV-2 clades in the WHO European  
115 Region, January to June 2020. *Eurosurveillance* 25(32):2001410. [https://doi.org/10.2807/1560-](https://doi.org/10.2807/1560-7917.ES.2020.25.32.2001410)  
116 [7917.ES.2020.25.32.2001410](https://doi.org/10.2807/1560-7917.ES.2020.25.32.2001410).
- 117 11. Katoh K, Standley DM, 2013. MAFFT multiple sequence alignment software version 7: improvements in  
118 performance and usability. *Molecular biology and evolution* 30(4): 772-780.  
119 <https://doi.org/10.1093/molbev/mst010>.
- 120

- 121 12. Nguyen L-T, Schmidt HA, Haeseler A, Minh BQ. 2015. IQ-TREE: A fast and effective stochastic algorithm for  
122 estimating maximum likelihood phylogenies. *Molecular biology and evolution* 32:268-274.  
123 <https://doi.org/10.1093/molbev/msu300>.
- 124 13. Rambaut A. 2014. Figtree, a graphical viewer of phylogenetic trees. <http://tree.bio.ed.ac.uk/software/figtree>.
- 125 14. Kumar S, Stecher G, Tamura K. 2016. MEGA7: Molecular Evolutionary Genetics Analysis Version 7.0 for  
126 Bigger Datasets. *Molecular biology and evolution* 33(7):1870-1874. <https://doi.org/10.1093/molbev/msw054>.
- 127 15. RITM. 2020. RITM releases first 17 sets of SARS-CoV-2 genome sequences from PH cases through Third  
128 Generation Sequencing Technology. <http://ritm.gov.ph/ritm-releases-first-17-sets-of-sars-cov-2-genome-sequences-from-ph-cases-through-third-generation-sequencing-technology/>. Accessed 22 August 2020.
- 129 16. PGC. 2020. PGC SARS-CoV-2 Bulletin No.1: Philippine Genome Center Reports Detection of the D614G  
130 Variant of SARS-CoV-2 Virus in the Philippines. <https://pgc.up.edu.ph/pgc-sars-cov-2-bulletin-no-1-philippine-genome-center-reports-detection-of-the-d614g-variant-of-sars-cov-2-virus-in-the-philippines/>. Accessed 22  
131 August 2020.
- 132 17. Korber B, Fischer WM, Gnanakaran S, Yoon H, Theiler J, Abfalterer W, Hengartner N, Giorgi EE, Bhattacharya  
133 T, Foley B, Hastie KM, Parker MD, Partridge DG, Evans CM, Freeman TM, de Silva TI, Sheffield C-GG,  
134 McDanal C, Perez LG, Tang H, Moon-Walker A, Whelan SP, LaBranche CC, Saphire EO, Montefiori DC. 2020.  
135 Tracking Changes in SARS-CoV-2 Spike: Evidence that D614G Increases Infectivity of the COVID-19 Virus.  
136 *Cell* doi:10.1016/j.cell.2020.06.043.
- 137 18. Ramos CM. 2020. Over 124,000 overseas Filipinos flown home amid COVID-19 pandemic — DFA, p *In*  
138 *Philippine Daily Inquirer*. Inquirer, Manila. <https://globalnation.inquirer.net/190171/over-124000-overseas-filipinos-flown-home-amid-covid-19-pandemic-dfa>.  
139  
140  
141  
142

**Table 1. Genome features of twenty-three strains of SARS-CoV-2 from the Philippines**

medRxiv preprint doi: <https://doi.org/10.1101/2020.09.29.20203695>; this version posted September 29, 2020. The copyright holder for this preprint (which was not certified by peer review) is the author/funder, who has granted medRxiv a license to display the preprint in perpetuity. All rights reserved. No reuse allowed without permission.

| Sequence name                           | Initial Sequence Read Archive (SRA) accession no.      | Collection date | Ct Value | City/Town, Region (province)         | Initial Clinical Presentation/Classification/Clinical Outcome | Genome size (bp) | GC content (%) | Mean Depth of coverage (x) | Coverage (%) | Clade | Lineage | Nucleotide substitution                                                                                                                 | Gene region:Amino acid substitution                                                                                                                                                                      |
|-----------------------------------------|--------------------------------------------------------|-----------------|----------|--------------------------------------|---------------------------------------------------------------|------------------|----------------|----------------------------|--------------|-------|---------|-----------------------------------------------------------------------------------------------------------------------------------------|----------------------------------------------------------------------------------------------------------------------------------------------------------------------------------------------------------|
| SAR-CoV-2/Philippines/AFRIMS-COVID-GS   | <a href="#">MT919768</a><br><a href="#">SRS7273360</a> | 3-Apr-20        | 25.27    | Makati City, National Capital Region | Moderate/Admitted/Recovered                                   | 29903            | 37.9           | 4508                       | 99.8         | O     | B.6     | C6312A<br>G11083T<br>C13730T<br>C23929T<br>C26224T<br>C28311T                                                                           | ORF1a: T2016K<br>ORF1a: L3606F<br>ORF1b: A88V<br>S: Synonymous mutation<br>Non-translation region<br>N: P13L                                                                                             |
| SAR-CoV-2/Philippines/AFRIMS-COVID-3304 | <a href="#">MT919769</a><br><a href="#">SRS7273361</a> | 25-Jun-20       | 18.80    | Quezon City, National Capital Region | Unknown/Admitted/Recovered                                    | 29903            | 38.0           | 4958                       | 99.7         | GR    | B.1.1   | C3037T<br>G11083T<br>C13051T<br>C14408T<br>C16726T<br>C21597T<br>A23403G<br>A27224C<br>G28881A, G28882A<br>G28883C<br>C29144T           | ORF1a: Synonymous mutation<br>ORF1a: L3606F<br>ORF1a: Synonymous mutation<br>ORF1b: P314L<br>ORF1b: H1087Y<br>S: S12F<br>S: D614G<br>ORF6: Q8P<br>N: R203K<br>N: G204R<br>N: Synonymous mutation         |
| SAR-CoV-2/Philippines/AFRIMS-COVID-3353 | <a href="#">MT919770</a><br><a href="#">SRS7273362</a> | 26-Jun-20       | 18.93    | Quezon City, National Capital Region | Mild/Admitted/Recovered                                       | 29903            | 38.0           | 4134                       | 99.7         | GR    | B.1.1   | C3037T<br>A3938C<br>C14408T<br>A23403G<br>G28881A, G28882A<br>G28883C<br>G28908T                                                        | ORF1a: Synonymous mutation<br>ORF1a: Synonymous mutation<br>ORF1b: P314L<br>S: D614G<br>N: R203K<br>N: G204R<br>N: G212V                                                                                 |
| SAR-CoV-2/Philippines/AFRIMS-COVID-3477 | <a href="#">MT919771</a><br><a href="#">SRS7273363</a> | 29-Jun-20       | 24.74    | Taguig City, National Capital Region | Moderate/Admitted/Recovered                                   | 29903            | 38.0           | 3856                       | 99.7         | GR    | B.1.1   | C3037T<br>C6726T<br>C14408T<br>G14414T<br>C21597T<br>A23403G<br>C26607T<br>G28881A, G28882A<br>G28883C<br>C29144T<br>G29543T<br>G29654A | ORF1a: Synonymous mutation<br>ORF1a: T2154I<br>ORF1b: P314L<br>ORF1b: S316I<br>S: S12F<br>S: D614G<br>M: L29F<br>N: R203K<br>N: G204R<br>N: Synonymous mutation<br>Non-translation region<br>ORF10: V33I |
| SAR-CoV-2/Philippines/AFRIMS-COVID-3493 | <a href="#">MT919772</a><br><a href="#">SRS7273364</a> | 29-Jun-20       | 20.97    | Quezon City, National Capital Region | Mild/Admitted/Recovered                                       | 29903            | 38.0           | 4448                       | 99.7         | GR    | B.1.1   | C3037T<br>A3938C<br>C14408T<br>A23403G<br>G28881A, G28882A<br>G28883C                                                                   | ORF1a: Synonymous mutation<br>ORF1a: Synonymous mutation<br>ORF1b: P314L<br>S: D614G<br>N: R203K<br>N: G204R                                                                                             |
| SAR-CoV-2/Philippines/AFRIMS-COVID-3563 | <a href="#">MT919773</a><br><a href="#">SRS7273365</a> | 29-Jun-20       | 23.29    | Pasay City, National Capital Region  | Unknown/Quarantine Facility/Recovered                         | 29903            | 38.0           | 5154                       | 99.7         | GR    | B.1.1   | C3037T<br>G11083T<br>C13051T<br>C14408T<br>C16726T<br>C21597T                                                                           | ORF1a: Synonymous mutation<br>ORF1a: L3606F<br>ORF1a: Synonymous mutation<br>ORF1b: P314L<br>ORF1b: H1087Y<br>S: S12F                                                                                    |

medRxiv preprint doi: <https://doi.org/10.1101/2020.09.29.20203695>; this version posted September 29, 2020. The copyright holder for this preprint (which was not certified by peer review) is the author/funder, who has granted medRxiv a license to display the preprint in perpetuity. All rights reserved. No reuse allowed without permission.

| Accession                               | Region                               | Date      | Age   | Location                                    | Status | Seqs | Pos  | Len  | GC | GR    | Lineage                                 | Mutations                                            |
|-----------------------------------------|--------------------------------------|-----------|-------|---------------------------------------------|--------|------|------|------|----|-------|-----------------------------------------|------------------------------------------------------|
| SAR-CoV-2/Philippines/AFRIMS-COVID-3593 | Quezon City, National Capital Region | 29-Jun-20 | 22.11 | Mild/Admitted/ Recovered                    | 29903  | 38.0 | 5987 | 99.7 | GR | B.1.1 | A23403G                                 | S: D614G                                             |
|                                         |                                      |           |       |                                             |        |      |      |      |    |       | A27224C                                 | ORF6: Q8P                                            |
|                                         |                                      |           |       |                                             |        |      |      |      |    |       | G28881A, G28882A                        | N: R203K                                             |
|                                         |                                      |           |       |                                             |        |      |      |      |    |       | G28883C                                 | N: G204R                                             |
|                                         |                                      |           |       |                                             |        |      |      |      |    |       | C29144T                                 | N: Synonymous mutation                               |
|                                         |                                      |           |       |                                             |        |      |      |      |    |       | C3037T                                  | ORF1a: Synonymous mutation                           |
|                                         |                                      |           |       |                                             |        |      |      |      |    |       | C7165T                                  | ORF1a: Synonymous mutation                           |
|                                         |                                      |           |       |                                             |        |      |      |      |    |       | G11083T                                 | ORF1a: L3606F                                        |
|                                         |                                      |           |       |                                             |        |      |      |      |    |       | C13051T                                 | ORF1a: Synonymous mutation                           |
|                                         |                                      |           |       |                                             |        |      |      |      |    |       | C14408T                                 | ORF1b: P314L                                         |
|                                         |                                      |           |       |                                             |        |      |      |      |    |       | C21597T                                 | S: S12F                                              |
|                                         |                                      |           |       |                                             |        |      |      |      |    |       | A23403G                                 | S: D614G                                             |
| C23934T                                 | S: T791I                             |           |       |                                             |        |      |      |      |    |       |                                         |                                                      |
| A27224C                                 | ORF6: Q8P                            |           |       |                                             |        |      |      |      |    |       |                                         |                                                      |
| G28881A, G28882A                        | N: R203K                             |           |       |                                             |        |      |      |      |    |       |                                         |                                                      |
| G28883C                                 | N: G204R                             |           |       |                                             |        |      |      |      |    |       |                                         |                                                      |
| C29144T                                 | N: Synonymous mutation               |           |       |                                             |        |      |      |      |    |       |                                         |                                                      |
| SAR-CoV-2/Philippines/AFRIMS-COVID-4149 | Quezon City, National Capital Region | 6-Jul-20  | 27.40 | Moderate/Unknown/ Unknown                   | 29903  | 37.9 | 5774 | 99.8 | GR | B.1.1 | C3037T                                  | ORF1a: Synonymous mutation                           |
|                                         |                                      |           |       |                                             |        |      |      |      |    |       | C7086T                                  | ORF1a: T2274I                                        |
|                                         |                                      |           |       |                                             |        |      |      |      |    |       | C9474T                                  | ORF1a: A3070V                                        |
|                                         |                                      |           |       |                                             |        |      |      |      |    |       | G11083T                                 | ORF1a: L3606F                                        |
|                                         |                                      |           |       |                                             |        |      |      |      |    |       | C13051T                                 | ORF1a: Synonymous mutation                           |
|                                         |                                      |           |       |                                             |        |      |      |      |    |       | C14408T                                 | ORF1b: P314L                                         |
|                                         |                                      |           |       |                                             |        |      |      |      |    |       | C21597T                                 | S: S12F                                              |
|                                         |                                      |           |       |                                             |        |      |      |      |    |       | A23403G                                 | S: D614G                                             |
|                                         |                                      |           |       |                                             |        |      |      |      |    |       | G28881A, G28882A                        | N: R203K                                             |
|                                         |                                      |           |       |                                             |        |      |      |      |    |       | G28883C                                 | N: G204R                                             |
|                                         |                                      |           |       |                                             |        |      |      |      |    |       | C29144T                                 | N: Synonymous mutation                               |
|                                         |                                      |           |       |                                             |        |      |      |      |    |       | SAR-CoV-2/Philippines/AFRIMS-COVID-4281 | Pasay City, National Capital Region                  |
| C3037T                                  | ORF1a: Synonymous mutation           |           |       |                                             |        |      |      |      |    |       |                                         |                                                      |
| G3641A                                  | ORF1a: E1126K                        |           |       |                                             |        |      |      |      |    |       |                                         |                                                      |
| C12053T                                 | ORF1a: L3930F                        |           |       |                                             |        |      |      |      |    |       |                                         |                                                      |
| C14408T                                 | ORF1b: P314L                         |           |       |                                             |        |      |      |      |    |       |                                         |                                                      |
| C20133T                                 | ORF1b: Synonymous mutation           |           |       |                                             |        |      |      |      |    |       |                                         |                                                      |
| A23403G                                 | S: D614G                             |           |       |                                             |        |      |      |      |    |       |                                         |                                                      |
| G25088T                                 | S: V1176F                            |           |       |                                             |        |      |      |      |    |       |                                         |                                                      |
| G27816A                                 | ORF7b: V21I                          |           |       |                                             |        |      |      |      |    |       |                                         |                                                      |
| G28881A, G28882A                        | N: R203K                             |           |       |                                             |        |      |      |      |    |       |                                         |                                                      |
| G28883C                                 | N: G204R                             |           |       |                                             |        |      |      |      |    |       |                                         |                                                      |
| SAR-CoV-2/Philippines/AFRIMS-COVID-4282 | Pasay City, National Capital Region  | 6-Jul-20  | 17.81 | Asymptomatic/Quarantine Facility/ Recovered | 29903  | 38.0 | 5454 | 99.7 | GR | B.1.1 |                                         |                                                      |
|                                         |                                      |           |       |                                             |        |      |      |      |    |       | C3037T                                  | ORF1a: Synonymous mutation                           |
|                                         |                                      |           |       |                                             |        |      |      |      |    |       | C3411T                                  | ORF1a: A1049V                                        |
|                                         |                                      |           |       |                                             |        |      |      |      |    |       | C10138T                                 | ORF1a: Synonymous mutation                           |
|                                         |                                      |           |       |                                             |        |      |      |      |    |       | C14408T                                 | ORF1b: P314L                                         |
|                                         |                                      |           |       |                                             |        |      |      |      |    |       | C20312T                                 | ORF1b: A2282V                                        |
|                                         |                                      |           |       |                                             |        |      |      |      |    |       | C21597T                                 | S: S12F                                              |
|                                         |                                      |           |       |                                             |        |      |      |      |    |       | A23403G                                 | S: D614G                                             |
|                                         |                                      |           |       |                                             |        |      |      |      |    |       | C28308G                                 | N: A12G                                              |
|                                         |                                      |           |       |                                             |        |      |      |      |    |       | G28881A, G28882A                        | N: R203K                                             |
|                                         |                                      |           |       |                                             |        |      |      |      |    |       | G28883C                                 | N: G204R                                             |
|                                         |                                      |           |       |                                             |        |      |      |      |    |       | 21-nucleotide deletion (28890-28910)    | N: S206Y and 7-amino acid deletion (207-PARMAGN-213) |
| C29144T                                 | N: Synonymous mutation               |           |       |                                             |        |      |      |      |    |       |                                         |                                                      |

medRxiv preprint doi: <https://doi.org/10.1101/2020.09.29.20203695>; this version posted September 29, 2020. The copyright holder for this preprint (which was not certified by peer review) is the author/funder, who has granted medRxiv a license to display the preprint in perpetuity. All rights reserved. No reuse allowed without permission.

|                                         |                                                        |           |       |                                      |                                             |       |      |      |      |    |          |                  |                            |
|-----------------------------------------|--------------------------------------------------------|-----------|-------|--------------------------------------|---------------------------------------------|-------|------|------|------|----|----------|------------------|----------------------------|
| SAR-CoV-2/Philippines/AFRIMS-COVID-4402 | <a href="#">MT919778</a><br><a href="#">SRS7273370</a> | 7-Jul-20  | 24.84 | Pasay City, National Capital Region  | Asymptomatic/Admitted/ Recovered            | 29903 | 38.0 | 6836 | 99.7 | GR | B.1.1.28 | G942A            | ORF1a: R226K               |
|                                         |                                                        |           |       |                                      |                                             |       |      |      |      |    |          | C3037T           | ORF1a: Synonymous mutation |
|                                         |                                                        |           |       |                                      |                                             |       |      |      |      |    |          | G3641A           | ORF1a: E1126K              |
|                                         |                                                        |           |       |                                      |                                             |       |      |      |      |    |          | C12053T          | ORF1a: L3930F              |
|                                         |                                                        |           |       |                                      |                                             |       |      |      |      |    |          | C14408T          | ORF1b: P314L               |
|                                         |                                                        |           |       |                                      |                                             |       |      |      |      |    |          | C20133T          | ORF1b: Synonymous mutation |
|                                         |                                                        |           |       |                                      |                                             |       |      |      |      |    |          | A23403G          | S: D614G                   |
|                                         |                                                        |           |       |                                      |                                             |       |      |      |      |    |          | G25088T          | S: V1176F                  |
|                                         |                                                        |           |       |                                      |                                             |       |      |      |      |    |          | G27816A          | ORF7b: V21I                |
|                                         |                                                        |           |       |                                      |                                             |       |      |      |      |    |          | G28881A, G28882A | N: R203K                   |
| G28883C                                 | N: G204R                                               |           |       |                                      |                                             |       |      |      |      |    |          |                  |                            |
| SAR-CoV-2/Philippines/AFRIMS-COVID-4650 | <a href="#">MT919779</a><br><a href="#">SRS7273371</a> | 10-Jul-20 | 26.60 | Cavite City, Region 4A (Cavite)      | Severe/Admitted/ Recovered                  | 29903 | 38.0 | 4987 | 99.7 | GR | B.1.1    | C3037T           | ORF1a: Synonymous mutation |
|                                         |                                                        |           |       |                                      |                                             |       |      |      |      |    |          | A3938C           | ORF1a: Synonymous mutation |
|                                         |                                                        |           |       |                                      |                                             |       |      |      |      |    |          | C5575T           | ORF1a: Synonymous mutation |
|                                         |                                                        |           |       |                                      |                                             |       |      |      |      |    |          | C14408T          | ORF1b: P314L               |
|                                         |                                                        |           |       |                                      |                                             |       |      |      |      |    |          | A19767G          | ORF1b: Synonymous mutation |
|                                         |                                                        |           |       |                                      |                                             |       |      |      |      |    |          | A23403G          | S: D614G                   |
|                                         |                                                        |           |       |                                      |                                             |       |      |      |      |    |          | G28881A, G28882A | N: R203K                   |
|                                         |                                                        |           |       |                                      |                                             |       |      |      |      |    |          | G28883C          | N: G204R                   |
|                                         |                                                        |           |       |                                      |                                             |       |      |      |      |    |          | G28908T          | N: G212V                   |
|                                         |                                                        |           |       |                                      |                                             |       |      |      |      |    |          | C2973T           | ORF1a: A903V               |
| SAR-CoV-2/Philippines/AFRIMS-COVID-4792 | <a href="#">MT919780</a><br><a href="#">SRS7273372</a> | 10-Jul-20 | 17.74 | Calamba City, Region 4A (Laguna)     | Asymptomatic/Quarantine Facility/ Recovered | 29903 | 37.9 | 6351 | 99.8 | GR | B.1.1    | C3037T           | ORF1a: Synonymous mutation |
|                                         |                                                        |           |       |                                      |                                             |       |      |      |      |    |          | C3411T           | ORF1a: A1049V              |
|                                         |                                                        |           |       |                                      |                                             |       |      |      |      |    |          | G11083T          | ORF1a: L3606F              |
|                                         |                                                        |           |       |                                      |                                             |       |      |      |      |    |          | C14408T          | ORF1b: P314L               |
|                                         |                                                        |           |       |                                      |                                             |       |      |      |      |    |          | C20312T          | ORF1b: A2282V              |
|                                         |                                                        |           |       |                                      |                                             |       |      |      |      |    |          | C21597T          | S: S12F                    |
|                                         |                                                        |           |       |                                      |                                             |       |      |      |      |    |          | A23403G          | S: D614G                   |
|                                         |                                                        |           |       |                                      |                                             |       |      |      |      |    |          | C28308G          | N: A12G                    |
|                                         |                                                        |           |       |                                      |                                             |       |      |      |      |    |          | G28881A, G28882A | N: R203K                   |
|                                         |                                                        |           |       |                                      |                                             |       |      |      |      |    |          | G28883C          | N: G204R                   |
| 21-nucleotide deletion (28890-28910)    | N: S206Y and 7-amino acid deletion (207-PARMAGN-213)   |           |       |                                      |                                             |       |      |      |      |    |          |                  |                            |
| C29144T                                 | N: Synonymous mutation                                 |           |       |                                      |                                             |       |      |      |      |    |          |                  |                            |
| SAR-CoV-2/Philippines/AFRIMS-COVID-4837 | <a href="#">MT919781</a><br><a href="#">SRS7273373</a> | 13-Jul-20 | 28.30 | Taguig City, National Capital Region | Asymptomatic/Self-quarantine/ Recovered     | 29903 | 38.0 | 2361 | 99.7 | GR | B.1.1    | C539T            | ORF1a: L92F                |
|                                         |                                                        |           |       |                                      |                                             |       |      |      |      |    |          | C3037T           | ORF1a: Synonymous mutation |
|                                         |                                                        |           |       |                                      |                                             |       |      |      |      |    |          | C8818T           | ORF1a: Synonymous mutation |
|                                         |                                                        |           |       |                                      |                                             |       |      |      |      |    |          | A10912G          | ORF1a: Synonymous mutation |
|                                         |                                                        |           |       |                                      |                                             |       |      |      |      |    |          | C14408T          | ORF1b: P314L               |
|                                         |                                                        |           |       |                                      |                                             |       |      |      |      |    |          | G17347T          | ORF1b: V1294F              |
|                                         |                                                        |           |       |                                      |                                             |       |      |      |      |    |          | T21198C          | ORF1b: Synonymous mutation |
|                                         |                                                        |           |       |                                      |                                             |       |      |      |      |    |          | C22120T          | S: Synonymous mutation     |
|                                         |                                                        |           |       |                                      |                                             |       |      |      |      |    |          | A23403G          | S: D614G                   |
|                                         |                                                        |           |       |                                      |                                             |       |      |      |      |    |          | G28881A, G28882A | N: R203K                   |
| G28883C                                 | N: G204R                                               |           |       |                                      |                                             |       |      |      |      |    |          |                  |                            |
| G29540T                                 | Non-translation region                                 |           |       |                                      |                                             |       |      |      |      |    |          |                  |                            |
| SAR-CoV-2/Philippines/AFRIMS-COVID-5127 | <a href="#">MT919782</a><br><a href="#">SRS7273374</a> | 14-Jul-20 | 30.22 | Taguig City, National Capital Region | Severe/Unknown/ Unknown                     | 29903 | 38.0 | 6780 | 99.7 | GR | B.1.1    | C3037T           | ORF1a: Synonymous mutation |
|                                         |                                                        |           |       |                                      |                                             |       |      |      |      |    |          | C4039T           | ORF1a: Synonymous mutation |
|                                         |                                                        |           |       |                                      |                                             |       |      |      |      |    |          | C14408T          | ORF1b: P314L               |
|                                         |                                                        |           |       |                                      |                                             |       |      |      |      |    |          | C16559A          | ORF1b: A1031E              |
|                                         |                                                        |           |       |                                      |                                             |       |      |      |      |    |          | G16808A          | ORF1b: S1114N              |
|                                         |                                                        |           |       |                                      |                                             |       |      |      |      |    |          | C19983T          | ORF1b: Synonymous mutation |
|                                         |                                                        |           |       |                                      |                                             |       |      |      |      |    |          | C21575T          | S: L5F                     |
|                                         |                                                        |           |       |                                      |                                             |       |      |      |      |    |          | A23403G          | S: D614G                   |



medRxiv preprint doi: <https://doi.org/10.1101/2020.09.29.20203695>; this version posted September 29, 2020. The copyright holder for this preprint (which was not certified by peer review) is the author/funder, who has granted medRxiv a license to display the preprint in perpetuity. All rights reserved. No reuse allowed without permission.

|                                         |                                                        |           |       |                                        |                                       |       |      |      |      |    |       |                  |                            |
|-----------------------------------------|--------------------------------------------------------|-----------|-------|----------------------------------------|---------------------------------------|-------|------|------|------|----|-------|------------------|----------------------------|
|                                         |                                                        |           |       |                                        |                                       |       |      |      |      |    |       | G28881A, G28882A | N: R203K                   |
|                                         |                                                        |           |       |                                        |                                       |       |      |      |      |    |       | G28883C          | N: G204R                   |
|                                         |                                                        |           |       |                                        |                                       |       |      |      |      |    |       | G28899T          | N: R209I                   |
|                                         |                                                        |           |       |                                        |                                       |       |      |      |      |    |       | C3037T           | ORF1a: Synonymous mutation |
|                                         |                                                        |           |       |                                        |                                       |       |      |      |      |    |       | G5924A           | ORF1a: V1887I              |
|                                         |                                                        |           |       |                                        |                                       |       |      |      |      |    |       | G6943T           | ORF1a: Synonymous mutation |
|                                         |                                                        |           |       |                                        |                                       |       |      |      |      |    |       | C14408T          | ORF1b: P314L               |
| SAR-CoV-2/Philippines/AFRIMS-COVID-5524 | <a href="#">MT919783</a><br><a href="#">SRS7273375</a> | 15-Jul-20 | 24.04 | Caloocan City, National Capital Region | Unknown/Self-quarantine/Recovered     | 29903 | 38.0 | 7110 | 99.7 | GR | B.1.1 | C18877T          | ORF1b: Synonymous mutation |
|                                         |                                                        |           |       |                                        |                                       |       |      |      |      |    |       | T21775G          | S: Synonymous mutation     |
|                                         |                                                        |           |       |                                        |                                       |       |      |      |      |    |       | A23403G          | S: D614G                   |
|                                         |                                                        |           |       |                                        |                                       |       |      |      |      |    |       | G28881A, G28882A | N: R203K                   |
|                                         |                                                        |           |       |                                        |                                       |       |      |      |      |    |       | G28883C          | N: G204R                   |
|                                         |                                                        |           |       |                                        |                                       |       |      |      |      |    |       | C2973T           | ORF1a: A903V               |
|                                         |                                                        |           |       |                                        |                                       |       |      |      |      |    |       | C3037T           | ORF1a: Synonymous mutation |
|                                         |                                                        |           |       |                                        |                                       |       |      |      |      |    |       | C11572T          | ORF1a: Synonymous mutation |
|                                         |                                                        |           |       |                                        |                                       |       |      |      |      |    |       | C14408T          | ORF1b: P314L               |
|                                         |                                                        |           |       |                                        |                                       |       |      |      |      |    |       | C18828T          | ORF1b: Synonymous mutation |
| SAR-CoV-2/Philippines/AFRIMS-COVID-5658 | <a href="#">MT919784</a><br><a href="#">SRS7273376</a> | 16-Jul-20 | 20.85 | Rodriguez, Region 4A (Rizal)           | Moderate/Admitted/Recovered           | 29903 | 37.9 | 5351 | 99.8 | GR | B.1.1 | C20312T          | ORF1b: A2282V              |
|                                         |                                                        |           |       |                                        |                                       |       |      |      |      |    |       | C21597T          | S: S12F                    |
|                                         |                                                        |           |       |                                        |                                       |       |      |      |      |    |       | A23403G          | S: D614G                   |
|                                         |                                                        |           |       |                                        |                                       |       |      |      |      |    |       | C26464T          | E: Synonymous mutation     |
|                                         |                                                        |           |       |                                        |                                       |       |      |      |      |    |       | G28881A, G28882A | N: R203K                   |
|                                         |                                                        |           |       |                                        |                                       |       |      |      |      |    |       | G28883C          | N: G204R                   |
|                                         |                                                        |           |       |                                        |                                       |       |      |      |      |    |       | C29144T          | N: Synonymous mutation     |
|                                         |                                                        |           |       |                                        |                                       |       |      |      |      |    |       | C593T            | ORF1a: H110Y               |
|                                         |                                                        |           |       |                                        |                                       |       |      |      |      |    |       | C3037T           | ORF1a: Synonymous mutation |
|                                         |                                                        |           |       |                                        |                                       |       |      |      |      |    |       | G5924A           | ORF1a: V1887I              |
|                                         |                                                        |           |       |                                        |                                       |       |      |      |      |    |       | C6525T           | ORF1a: T2087I              |
|                                         |                                                        |           |       |                                        |                                       |       |      |      |      |    |       | G6943T           | ORF1a: Synonymous mutation |
| CSAR-CoV-2/Philippines/AFRIMS-OVID-5698 | <a href="#">MT919785</a><br><a href="#">SRS7273377</a> | 16-Jul-20 | 19.37 | San Juan City, National Capital Region | Unknown/Quarantine Facility/Recovered | 29903 | 38.0 | 6330 | 99.7 | GR | B.1.1 | C14408T          | ORF1b: P314L               |
|                                         |                                                        |           |       |                                        |                                       |       |      |      |      |    |       | G17278T          | ORF1b: V1271L              |
|                                         |                                                        |           |       |                                        |                                       |       |      |      |      |    |       | C18395T          | ORF1b: A1643V              |
|                                         |                                                        |           |       |                                        |                                       |       |      |      |      |    |       | T21775G          | S: Synonymous mutation     |
|                                         |                                                        |           |       |                                        |                                       |       |      |      |      |    |       | A23403G          | S: D614G                   |
|                                         |                                                        |           |       |                                        |                                       |       |      |      |      |    |       | G28881A, G28882A | N: R203K                   |
|                                         |                                                        |           |       |                                        |                                       |       |      |      |      |    |       | G28883C          | N: G204R                   |
|                                         |                                                        |           |       |                                        |                                       |       |      |      |      |    |       | C3037T           | ORF1a: Synonymous mutation |
|                                         |                                                        |           |       |                                        |                                       |       |      |      |      |    |       | C6726T           | ORF1a: T2154I              |
|                                         |                                                        |           |       |                                        |                                       |       |      |      |      |    |       | G11083T          | ORF1a: L3606F              |
|                                         |                                                        |           |       |                                        |                                       |       |      |      |      |    |       | C13051T          | ORF1a: Synonymous mutation |
|                                         |                                                        |           |       |                                        |                                       |       |      |      |      |    |       | C14408T          | ORF1b: P314L               |
| SAR-CoV-2/Philippines/AFRIMS-COVID-5918 | <a href="#">MT919786</a><br><a href="#">SRS7273378</a> | 17-Jul-20 | 27.90 | Taguig City, National Capital Region   | Severe/Admitted/ Died                 | 29903 | 37.9 | 6038 | 99.8 | GR | B.1.1 | C21597T          | S: S12F                    |
|                                         |                                                        |           |       |                                        |                                       |       |      |      |      |    |       | A23403G          | S: D614G                   |
|                                         |                                                        |           |       |                                        |                                       |       |      |      |      |    |       | A27224C          | ORF6: Q8P                  |
|                                         |                                                        |           |       |                                        |                                       |       |      |      |      |    |       | G27632C          | ORF7a: R80T                |
|                                         |                                                        |           |       |                                        |                                       |       |      |      |      |    |       | G28378A          | N: Synonymous mutation     |
|                                         |                                                        |           |       |                                        |                                       |       |      |      |      |    |       | G28881A, G28882A | N: R203K                   |
|                                         |                                                        |           |       |                                        |                                       |       |      |      |      |    |       | G28883C          | N: G204R                   |
|                                         |                                                        |           |       |                                        |                                       |       |      |      |      |    |       | C29144T          | N: Synonymous mutation     |
|                                         |                                                        |           |       |                                        |                                       |       |      |      |      |    |       | C3037T           | ORF1a: Synonymous mutation |
|                                         |                                                        |           |       |                                        |                                       |       |      |      |      |    |       | G11083T          | ORF1a: L3606F              |
|                                         |                                                        |           |       |                                        |                                       |       |      |      |      |    |       | C13051T          | ORF1a: Synonymous mutation |
|                                         |                                                        |           |       |                                        |                                       |       |      |      |      |    |       | C14408T          | ORF1b: P314L               |
| SAR-CoV-2/Philippines/AFRIMS-COVID-5976 | <a href="#">MT919787</a>                               | 18-Jul-20 | 20.22 | Quezon City, National Capital          | Asymptomatic/Admitted/                | 29903 | 38.0 | 6575 | 99.7 | GR | B.1.1 | C21597T          | S: S12F                    |

SAR-CoV-2/Philippines/AFRIMS-COVID-5970

[SRS7273379](#)

18-Jul-20

20.52

Region

Recovered

29903

38.0

6521.5

99.7

GR

B.1.1

A23403G

S: D614G

A27224C

ORF6: Q8P

G28881A, G28882A

N: R203K

G28883C

N: G204R

C29144T

N: Synonymous mutation

C3037T

ORF1a: Synonymous mutation

A3938C

ORF1a: Synonymous mutation

G7042T

ORF1a: M2259I

C7735T

ORF1a: Synonymous mutation

A9782G

ORF1a: S3173G

C14408T

ORF1b: P314L

A23403G

S: D614G

C28093T

ORF8: S67F

G28881A, G28882A

N: R203K

G28883C

N: G204R

SAR-CoV-2/Philippines/AFRIMS-COVID-5983

[MT919788](#)  
[SRS7273380](#)

18-Jul-20

22.27

Pasay City, National Capital  
RegionMild/Quarantine Facility/  
Recovered

29903

38.0

6974.4

99.7

GR

B.1.1

C3037T

ORF1a: Synonymous mutation

A3938C

ORF1a: Synonymous mutation

G7042T

ORF1a: M2259I

C7735T

ORF1a: Synonymous mutation

A9782G

ORF1a: S3173G

C14408T

ORF1b: P314L

A23403G

S: D614G

C28093T

ORF8: S67F

G28881A, G28882A

N: R203K

G28883C

N: G204R

SAR-CoV-2/Philippines/AFRIMS-COVID-5984

[MT919789](#)  
[SRS7273381](#)

18-Jul-20

22.96

Quezon City, National Capital  
RegionUnknown/Quarantine Facility/  
Recovered

29903

38.0

7177

99.7

GR

B.1.1

C3037T

ORF1a: Synonymous mutation

A3938C

ORF1a: Synonymous mutation

G7042T

ORF1a: M2259I

C7735T

ORF1a: Synonymous mutation

A9782G

ORF1a: S3173G

C14408T

ORF1b: P314L

A23403G

S: D614G

C26305T

E: L21F

C28093T

ORF8: S67F

G28881A, G28882A

N: R203K

G28883C

N: G204R

SAR-CoV-2/Philippines/AFRIMS-COVID-6009

[MT919790](#)  
[SRS7273382](#)

18-Jul-20

26.55

San Jose del Monte City,  
Region 3 (Bulacan)Mild/Self-quarantine/  
Recovered

29903

38.0

6970

99.7

GR

B.1.1

C3037T

ORF1a: Synonymous mutation

A3938C

ORF1a: Synonymous mutation

G7042T

ORF1a: M2259I

C7735T

ORF1a: Synonymous mutation

A9782G

ORF1a: S3173G

C14408T

ORF1b: P314L

A23403G

S: D614G

C26305T

E: L21F

C28093T

ORF8: S67F

G28881A, G28882A

N: R203K

G28883C

N: G204R

medRxiv preprint doi: <https://doi.org/10.1101/2020.09.29.20203695>; this version posted September 29, 2020. The copyright holder for this preprint (which was not certified by peer review) is the author/funder, who has granted medRxiv a license to display the preprint in perpetuity. All rights reserved. No reuse allowed without permission.
